# Supplementary material
Source: publisher figshare collection journal article supplement (https://acs.figshare.com/ndownloader/files/4390984)
Supplement: Supplementary file 1 [file 4390984]

  
data_cas32 
  
_audit_creation_method            SHELXL-97 
_chemical_name_systematic 
; 
 ? 
; 
_chemical_name_common             ? 
_chemical_melting_point           ? 
_chemical_formula_moiety          ? 
_chemical_formula_sum 
 'C41 H40 O4 Ru' 
_chemical_formula_weight          697.80 
  
loop_ 
 _atom_type_symbol 
 _atom_type_description 
 _atom_type_scat_dispersion_real 
 _atom_type_scat_dispersion_imag 
 _atom_type_scat_source 
 'C'  'C'   0.0033   0.0016 
 'International Tables Vol C Tables 4.2.6.8 and 6.1.1.4' 
 'H'  'H'   0.0000   0.0000 
 'International Tables Vol C Tables 4.2.6.8 and 6.1.1.4' 
 'O'  'O'   0.0106   0.0060 
 'International Tables Vol C Tables 4.2.6.8 and 6.1.1.4' 
 'Ru'  'Ru'  -1.2594   0.8363 
 'International Tables Vol C Tables 4.2.6.8 and 6.1.1.4' 
  
_symmetry_cell_setting            Monoclinic 
_symmetry_space_group_name_H-M    P2(1)/n 
  
loop_ 
 _symmetry_equiv_pos_as_xyz 
 'x, y, z' 
 '-x+1/2, y+1/2, -z+1/2' 
 '-x, -y, -z' 
 'x-1/2, -y-1/2, z-1/2' 
  
_cell_length_a                    14.3325(14) 
_cell_length_b                    13.4732(14) 
_cell_length_c                    18.2546(19) 
_cell_angle_alpha                 90.00 
_cell_angle_beta                  101.331(3) 
_cell_angle_gamma                 90.00 
_cell_volume                      3456.3(6) 
_cell_formula_units_Z             4 
_cell_measurement_temperature     173(2) 
_cell_measurement_reflns_used     ? 
_cell_measurement_theta_min       ? 
_cell_measurement_theta_max       ? 
  
_exptl_crystal_description        ? 
_exptl_crystal_colour             ? 
_exptl_crystal_size_max           0.40 
_exptl_crystal_size_mid           0.30 
_exptl_crystal_size_min           0.20 
_exptl_crystal_density_meas       0 
_exptl_crystal_density_diffrn     1.341 
_exptl_crystal_density_method     'not measured' 
_exptl_crystal_F_000              1448 
_exptl_absorpt_coefficient_mu     0.494 
_exptl_absorpt_correction_type    none 
_exptl_absorpt_correction_T_min   0.8270 
_exptl_absorpt_correction_T_max   0.9077 
_exptl_absorpt_process_details    ? 
  
_exptl_special_details 
; 
 ? 
; 
  
_diffrn_ambient_temperature       173(2) 
_diffrn_radiation_wavelength      0.71073 
_diffrn_radiation_type            MoK\a 
_diffrn_radiation_source          'fine-focus sealed tube' 
_diffrn_radiation_monochromator   graphite 
_diffrn_measurement_device_type   'CCD area detector' 
_diffrn_measurement_method        'phi and omega scans' 
_diffrn_detector_area_resol_mean  ? 
_diffrn_standards_number          ? 
_diffrn_standards_interval_count  ? 
_diffrn_standards_interval_time   ? 
_diffrn_standards_decay_%         ? 
_diffrn_reflns_number             16453 
_diffrn_reflns_av_R_equivalents   0.0279 
_diffrn_reflns_av_sigmaI/netI     0.0398 
_diffrn_reflns_limit_h_min        -12 
_diffrn_reflns_limit_h_max        17 
_diffrn_reflns_limit_k_min        -16 
_diffrn_reflns_limit_k_max        14 
_diffrn_reflns_limit_l_min        -22 
_diffrn_reflns_limit_l_max        17 
_diffrn_reflns_theta_min          1.66 
_diffrn_reflns_theta_max          26.39 
_reflns_number_total              6863 
_reflns_number_gt                 5224 
_reflns_threshold_expression      >2sigma(I) 
  
_computing_data_collection        'Bruker SMART' 
_computing_cell_refinement        'Bruker SMART' 
_computing_data_reduction         'Bruker SAINT' 
_computing_structure_solution     'SHELXS-97 (Sheldrick, 1990)' 
_computing_structure_refinement   'SHELXL-97 (Sheldrick, 1997)' 
_computing_molecular_graphics     'Bruker SHELXTL' 
_computing_publication_material   'Bruker SHELXTL' 
  
_refine_special_details 
; 
 Refinement of F^2^ against ALL reflections.  The weighted R-factor wR and 
 goodness of fit S are based on F^2^, conventional R-factors R are based 
 on F, with F set to zero for negative F^2^. The threshold expression of 
 F^2^ > 2sigma(F^2^) is used only for calculating R-factors(gt) etc. and is 
 not relevant to the choice of reflections for refinement.  R-factors based 
 on F^2^ are statistically about twice as large as those based on F, and R- 
 factors based on ALL data will be even larger. 
; 
  
_refine_ls_structure_factor_coef  Fsqd 
_refine_ls_matrix_type            full 
_refine_ls_weighting_scheme       calc 
_refine_ls_weighting_details 
 'calc w=1/[\s^2^(Fo^2^)+(0.0432P)^2^+0.0000P] where P=(Fo^2^+2Fc^2^)/3' 
_atom_sites_solution_primary      direct 
_atom_sites_solution_secondary    difmap 
_atom_sites_solution_hydrogens    geom 
_refine_ls_hydrogen_treatment     mixed 
_refine_ls_extinction_method      none 
_refine_ls_extinction_coef        ? 
_refine_ls_number_reflns          6863 
_refine_ls_number_parameters      373 
_refine_ls_number_restraints      0 
_refine_ls_R_factor_all           0.0439 
_refine_ls_R_factor_gt            0.0310 
_refine_ls_wR_factor_ref          0.0809 
_refine_ls_wR_factor_gt           0.0776 
_refine_ls_goodness_of_fit_ref    1.008 
_refine_ls_restrained_S_all       1.008 
_refine_ls_shift/su_max           0.001 
_refine_ls_shift/su_mean          0.000 
  
loop_ 
 _atom_site_label 
 _atom_site_type_symbol 
 _atom_site_fract_x 
 _atom_site_fract_y 
 _atom_site_fract_z 
 _atom_site_U_iso_or_equiv 
 _atom_site_adp_type 
 _atom_site_occupancy 
 _atom_site_symmetry_multiplicity 
 _atom_site_calc_flag 
 _atom_site_refinement_flags 
 _atom_site_disorder_assembly 
 _atom_site_disorder_group 
Ru Ru -0.027409(12) -0.005385(11) 0.164438(9) 0.02818(7) Uani 1 1 d . . . 
O1 O -0.12605(11) 0.04783(10) 0.30773(8) 0.0350(3) Uani 1 1 d . . . 
H1 H -0.1679 0.0919 0.3057 0.053 Uiso 1 1 calc R . . 
O2 O 0.10321(13) -0.16543(12) 0.12708(10) 0.0560(5) Uani 1 1 d . . . 
O3 O -0.13332(17) -0.00237(12) 0.00468(11) 0.0632(6) Uani 1 1 d . . . 
O4 O -0.24096(12) -0.34396(12) 0.15809(10) 0.0499(4) Uani 1 1 d . . . 
C1 C -0.06123(15) 0.07706(14) 0.26856(11) 0.0306(5) Uani 1 1 d . . . 
C2 C 0.03301(15) 0.03769(15) 0.28325(12) 0.0306(5) Uani 1 1 d . . . 
C3 C 0.08580(15) 0.08925(14) 0.23489(11) 0.0306(5) Uani 1 1 d . . . 
C4 C 0.02197(15) 0.15342(14) 0.18701(11) 0.0301(5) Uani 1 1 d . . . 
C5 C -0.07258(15) 0.14226(14) 0.20568(11) 0.0296(5) Uani 1 1 d . . . 
C6 C 0.06914(16) -0.02999(16) 0.34749(12) 0.0318(5) Uani 1 1 d . . . 
C7 C 0.0798(2) 0.00639(17) 0.41986(14) 0.0473(6) Uani 1 1 d . . . 
H7 H 0.0652 0.0740 0.4273 0.057 Uiso 1 1 calc R . . 
C8 C 0.11109(19) -0.0534(2) 0.48126(14) 0.0532(7) Uani 1 1 d . . . 
H8 H 0.1178 -0.0270 0.5303 0.064 Uiso 1 1 calc R . . 
C9 C 0.13245(19) -0.15136(19) 0.47103(14) 0.0514(7) Uani 1 1 d . . . 
H9 H 0.1548 -0.1929 0.5129 0.062 Uiso 1 1 calc R . . 
C10 C 0.1212(2) -0.18844(19) 0.40016(15) 0.0590(7) Uani 1 1 d . . . 
H10 H 0.1353 -0.2562 0.3931 0.071 Uiso 1 1 calc R . . 
C11 C 0.08957(18) -0.12892(17) 0.33867(13) 0.0465(6) Uani 1 1 d . . . 
H11 H 0.0818 -0.1563 0.2899 0.056 Uiso 1 1 calc R . . 
C12 C 0.19017(15) 0.08271(14) 0.23858(12) 0.0324(5) Uani 1 1 d . . . 
C13 C 0.22924(16) 0.06446(16) 0.17617(13) 0.0397(5) Uani 1 1 d . . . 
H13 H 0.1887 0.0522 0.1293 0.048 Uiso 1 1 calc R . . 
C14 C 0.32701(18) 0.06398(18) 0.18184(15) 0.0493(6) Uani 1 1 d . . . 
H14 H 0.3524 0.0509 0.1385 0.059 Uiso 1 1 calc R . . 
C15 C 0.38872(17) 0.08202(17) 0.24877(15) 0.0477(6) Uani 1 1 d . . . 
C16 C 0.34931(18) 0.09992(19) 0.31024(15) 0.0530(7) Uani 1 1 d . . . 
H16 H 0.3902 0.1122 0.3570 0.064 Uiso 1 1 calc R . . 
C17 C 0.25133(17) 0.10069(17) 0.30610(13) 0.0432(6) Uani 1 1 d . . . 
H17 H 0.2263 0.1136 0.3496 0.052 Uiso 1 1 calc R . . 
C18 C 0.49604(19) 0.0820(2) 0.25367(19) 0.0755(9) Uani 1 1 d . . . 
H18A H 0.5158 0.1460 0.2363 0.113 Uiso 1 1 calc R . . 
H18B H 0.5132 0.0287 0.2223 0.113 Uiso 1 1 calc R . . 
H18C H 0.5281 0.0712 0.3056 0.113 Uiso 1 1 calc R . . 
C19 C 0.04781(15) 0.22725(14) 0.13355(11) 0.0304(5) Uani 1 1 d . . . 
C20 C -0.00156(16) 0.23587(15) 0.06043(12) 0.0368(5) Uani 1 1 d . . . 
H20 H -0.0528 0.1919 0.0424 0.044 Uiso 1 1 calc R . . 
C21 C 0.02303(17) 0.30777(17) 0.01356(12) 0.0400(6) Uani 1 1 d . . . 
H21 H -0.0116 0.3118 -0.0364 0.048 Uiso 1 1 calc R . . 
C22 C 0.09654(16) 0.37390(15) 0.03724(13) 0.0385(5) Uani 1 1 d . . . 
C23 C 0.14595(17) 0.36516(17) 0.11035(14) 0.0453(6) Uani 1 1 d . . . 
H23 H 0.1972 0.4092 0.1281 0.054 Uiso 1 1 calc R . . 
C24 C 0.12211(17) 0.29341(16) 0.15807(13) 0.0407(5) Uani 1 1 d . . . 
H24 H 0.1568 0.2894 0.2080 0.049 Uiso 1 1 calc R . . 
C25 C 0.12277(19) 0.45157(18) -0.01513(15) 0.0514(7) Uani 1 1 d . . . 
H25A H 0.1585 0.4203 -0.0495 0.077 Uiso 1 1 calc R . . 
H25B H 0.1621 0.5029 0.0140 0.077 Uiso 1 1 calc R . . 
H25C H 0.0647 0.4818 -0.0437 0.077 Uiso 1 1 calc R . . 
C26 C -0.15931(16) 0.20129(15) 0.17501(12) 0.0331(5) Uani 1 1 d . . . 
C27 C -0.24769(16) 0.15529(18) 0.15308(13) 0.0410(5) Uani 1 1 d . . . 
H27 H -0.2525 0.0851 0.1559 0.049 Uiso 1 1 calc R . . 
C28 C -0.32810(19) 0.2113(2) 0.12728(14) 0.0534(7) Uani 1 1 d . . . 
H28 H -0.3880 0.1795 0.1128 0.064 Uiso 1 1 calc R . . 
C29 C -0.3219(2) 0.3136(2) 0.12238(14) 0.0554(7) Uani 1 1 d . . . 
H29 H -0.3775 0.3518 0.1047 0.066 Uiso 1 1 calc R . . 
C30 C -0.23461(19) 0.36002(18) 0.14330(14) 0.0485(6) Uani 1 1 d . . . 
H30 H -0.2300 0.4301 0.1396 0.058 Uiso 1 1 calc R . . 
C31 C -0.15425(17) 0.30412(16) 0.16949(13) 0.0397(5) Uani 1 1 d . . . 
H31 H -0.0945 0.3364 0.1840 0.048 Uiso 1 1 calc R . . 
C32 C 0.05351(17) -0.10547(16) 0.14067(12) 0.0375(5) Uani 1 1 d . . . 
C33 C -0.09224(19) -0.00328(15) 0.06437(13) 0.0391(5) Uani 1 1 d . . . 
C34 C -0.12176(16) -0.11191(15) 0.18296(12) 0.0342(5) Uani 1 1 d . . . 
H34 H -0.1535 -0.0957 0.2224 0.041 Uiso 1 1 calc R . . 
C35 C -0.14816(16) -0.19987(16) 0.15103(13) 0.0399(5) Uani 1 1 d . . . 
H35 H -0.1224 -0.2219 0.1097 0.048 Uiso 1 1 calc R . . 
C36 C -0.21498(16) -0.26031(16) 0.17926(12) 0.0389(5) Uani 1 1 d . . . 
H36 H -0.2420 -0.2329 0.2183 0.047 Uiso 1 1 calc R . . 
  
loop_ 
 _atom_site_aniso_label 
 _atom_site_aniso_U_11 
 _atom_site_aniso_U_22 
 _atom_site_aniso_U_33 
 _atom_site_aniso_U_23 
 _atom_site_aniso_U_13 
 _atom_site_aniso_U_12 
Ru 0.03374(11) 0.02460(10) 0.02764(10) -0.00090(7) 0.00954(7) -0.00190(7) 
O1 0.0416(9) 0.0299(8) 0.0376(8) 0.0064(7) 0.0175(7) 0.0079(7) 
O2 0.0561(11) 0.0418(10) 0.0751(13) -0.0131(9) 0.0250(10) 0.0073(9) 
O3 0.0867(16) 0.0638(13) 0.0333(10) -0.0013(8) -0.0023(10) -0.0085(10) 
O4 0.0600(11) 0.0433(9) 0.0537(11) -0.0142(8) 0.0286(9) -0.0210(8) 
C1 0.0408(13) 0.0234(10) 0.0293(11) -0.0018(8) 0.0111(10) -0.0017(9) 
C2 0.0378(13) 0.0252(9) 0.0295(11) -0.0006(9) 0.0083(10) 0.0005(9) 
C3 0.0372(12) 0.0252(10) 0.0293(11) -0.0031(8) 0.0065(9) -0.0006(9) 
C4 0.0358(12) 0.0259(10) 0.0289(11) -0.0023(8) 0.0071(9) -0.0013(9) 
C5 0.0357(12) 0.0249(10) 0.0289(11) -0.0010(8) 0.0078(9) 0.0001(9) 
C6 0.0308(12) 0.0335(10) 0.0319(12) 0.0027(9) 0.0081(9) 0.0009(9) 
C7 0.0640(18) 0.0394(13) 0.0382(13) 0.0000(10) 0.0097(12) 0.0066(11) 
C8 0.0705(19) 0.0596(17) 0.0292(13) 0.0078(12) 0.0095(13) 0.0028(14) 
C9 0.0578(17) 0.0536(15) 0.0413(15) 0.0191(12) 0.0065(13) 0.0080(13) 
C10 0.081(2) 0.0392(14) 0.0553(17) 0.0104(12) 0.0084(15) 0.0202(13) 
C11 0.0603(17) 0.0407(13) 0.0371(13) 0.0026(10) 0.0057(12) 0.0111(12) 
C12 0.0364(12) 0.0238(10) 0.0361(12) 0.0031(9) 0.0055(10) -0.0023(9) 
C13 0.0373(13) 0.0431(13) 0.0400(13) -0.0049(10) 0.0111(11) -0.0036(10) 
C14 0.0423(15) 0.0502(15) 0.0589(16) -0.0057(12) 0.0190(13) -0.0065(12) 
C15 0.0372(14) 0.0427(13) 0.0620(17) 0.0065(12) 0.0065(13) -0.0068(11) 
C16 0.0432(15) 0.0577(16) 0.0509(16) 0.0046(13) -0.0079(13) -0.0115(12) 
C17 0.0452(14) 0.0471(13) 0.0365(13) -0.0017(11) 0.0061(11) -0.0048(11) 
C18 0.0377(16) 0.087(2) 0.101(3) 0.0006(19) 0.0104(16) -0.0091(15) 
C19 0.0347(12) 0.0241(10) 0.0342(12) 0.0013(8) 0.0110(10) 0.0001(9) 
C20 0.0427(13) 0.0321(11) 0.0364(12) 0.0019(9) 0.0099(10) -0.0054(10) 
C21 0.0522(15) 0.0348(12) 0.0330(13) 0.0053(9) 0.0084(11) 0.0004(10) 
C22 0.0433(13) 0.0281(11) 0.0494(14) 0.0061(10) 0.0216(11) 0.0042(10) 
C23 0.0427(14) 0.0324(12) 0.0600(16) 0.0026(11) 0.0084(12) -0.0086(10) 
C24 0.0468(14) 0.0341(12) 0.0393(13) 0.0018(10) 0.0035(11) -0.0065(10) 
C25 0.0600(17) 0.0372(13) 0.0627(17) 0.0119(12) 0.0257(14) 0.0020(12) 
C26 0.0404(13) 0.0315(11) 0.0293(11) 0.0032(9) 0.0115(10) 0.0051(10) 
C27 0.0443(14) 0.0388(12) 0.0398(13) 0.0026(10) 0.0078(11) 0.0040(11) 
C28 0.0479(16) 0.0600(16) 0.0497(15) 0.0039(13) 0.0029(13) 0.0034(13) 
C29 0.0534(17) 0.0642(17) 0.0500(16) 0.0176(13) 0.0137(13) 0.0259(14) 
C30 0.0608(17) 0.0402(13) 0.0503(15) 0.0152(11) 0.0247(13) 0.0161(12) 
C31 0.0459(14) 0.0358(12) 0.0405(13) 0.0080(10) 0.0162(11) 0.0062(10) 
C32 0.0428(13) 0.0310(11) 0.0405(13) -0.0050(10) 0.0125(11) -0.0088(10) 
C33 0.0510(15) 0.0333(12) 0.0337(13) -0.0039(10) 0.0096(11) -0.0055(10) 
C34 0.0417(13) 0.0316(11) 0.0322(11) 0.0005(9) 0.0143(10) -0.0033(10) 
C35 0.0464(14) 0.0389(12) 0.0379(13) -0.0055(10) 0.0170(11) -0.0088(11) 
C36 0.0440(14) 0.0390(12) 0.0363(12) -0.0046(10) 0.0139(11) -0.0074(11) 
  
_geom_special_details 
; 
 All esds (except the esd in the dihedral angle between two l.s. planes) 
 are estimated using the full covariance matrix.  The cell esds are taken 
 into account individually in the estimation of esds in distances, angles 
 and torsion angles; correlations between esds in cell parameters are only 
 used when they are defined by crystal symmetry.  An approximate (isotropic) 
 treatment of cell esds is used for estimating esds involving l.s. planes. 
; 
  
loop_ 
 _geom_bond_atom_site_label_1 
 _geom_bond_atom_site_label_2 
 _geom_bond_distance 
 _geom_bond_site_symmetry_2 
 _geom_bond_publ_flag 
Ru C33 1.880(2) . ? 
Ru C32 1.884(2) . ? 
Ru C34 2.045(2) . ? 
Ru C2 2.248(2) . ? 
Ru C3 2.257(2) . ? 
Ru C4 2.266(2) . ? 
Ru C5 2.2660(19) . ? 
Ru C1 2.333(2) . ? 
O1 C1 1.338(2) . ? 
O2 C32 1.136(3) . ? 
O3 C33 1.132(3) . ? 
O4 C36 1.225(3) . ? 
C1 C2 1.427(3) . ? 
C1 C5 1.429(3) . ? 
C2 C3 1.448(3) . ? 
C2 C6 1.495(3) . ? 
C3 C4 1.426(3) . ? 
C3 C12 1.487(3) . ? 
C4 C5 1.469(3) . ? 
C4 C19 1.490(3) . ? 
C5 C26 1.489(3) . ? 
C6 C11 1.381(3) . ? 
C6 C7 1.389(3) . ? 
C7 C8 1.382(3) . ? 
C8 C9 1.376(4) . ? 
C9 C10 1.367(4) . ? 
C10 C11 1.381(3) . ? 
C12 C17 1.386(3) . ? 
C12 C13 1.387(3) . ? 
C13 C14 1.385(3) . ? 
C14 C15 1.382(4) . ? 
C15 C16 1.373(4) . ? 
C15 C18 1.523(3) . ? 
C16 C17 1.391(3) . ? 
C19 C20 1.387(3) . ? 
C19 C24 1.393(3) . ? 
C20 C21 1.383(3) . ? 
C21 C22 1.383(3) . ? 
C22 C23 1.388(3) . ? 
C22 C25 1.514(3) . ? 
C23 C24 1.388(3) . ? 
C26 C31 1.392(3) . ? 
C26 C27 1.396(3) . ? 
C27 C28 1.381(3) . ? 
C28 C29 1.385(4) . ? 
C29 C30 1.384(4) . ? 
C30 C31 1.381(3) . ? 
C34 C35 1.342(3) . ? 
C35 C36 1.428(3) . ? 
  
loop_ 
 _geom_angle_atom_site_label_1 
 _geom_angle_atom_site_label_2 
 _geom_angle_atom_site_label_3 
 _geom_angle 
 _geom_angle_site_symmetry_1 
 _geom_angle_site_symmetry_3 
 _geom_angle_publ_flag 
C33 Ru C32 89.78(10) . . ? 
C33 Ru C34 87.40(9) . . ? 
C32 Ru C34 89.59(9) . . ? 
C33 Ru C2 163.11(8) . . ? 
C32 Ru C2 105.61(9) . . ? 
C34 Ru C2 99.41(8) . . ? 
C33 Ru C3 135.07(8) . . ? 
C32 Ru C3 97.44(8) . . ? 
C34 Ru C3 136.64(8) . . ? 
C2 Ru C3 37.50(7) . . ? 
C33 Ru C4 103.86(8) . . ? 
C32 Ru C4 122.23(8) . . ? 
C34 Ru C4 145.66(8) . . ? 
C2 Ru C4 62.18(7) . . ? 
C3 Ru C4 36.76(7) . . ? 
C33 Ru C5 100.99(8) . . ? 
C32 Ru C5 159.04(9) . . ? 
C34 Ru C5 108.65(8) . . ? 
C2 Ru C5 62.21(7) . . ? 
C3 Ru C5 62.29(7) . . ? 
C4 Ru C5 37.82(7) . . ? 
C33 Ru C1 129.96(9) . . ? 
C32 Ru C1 139.84(9) . . ? 
C34 Ru C1 87.11(8) . . ? 
C2 Ru C1 36.23(7) . . ? 
C3 Ru C1 60.52(8) . . ? 
C4 Ru C1 60.64(7) . . ? 
C5 Ru C1 36.17(7) . . ? 
O1 C1 C2 121.41(18) . . ? 
O1 C1 C5 128.95(19) . . ? 
C2 C1 C5 109.50(18) . . ? 
O1 C1 Ru 124.92(13) . . ? 
C2 C1 Ru 68.63(11) . . ? 
C5 C1 Ru 69.35(11) . . ? 
C1 C2 C3 107.20(18) . . ? 
C1 C2 C6 122.91(18) . . ? 
C3 C2 C6 128.95(19) . . ? 
C1 C2 Ru 75.14(12) . . ? 
C3 C2 Ru 71.58(11) . . ? 
C6 C2 Ru 127.42(15) . . ? 
C4 C3 C2 108.38(19) . . ? 
C4 C3 C12 125.61(18) . . ? 
C2 C3 C12 125.84(18) . . ? 
C4 C3 Ru 71.97(11) . . ? 
C2 C3 Ru 70.92(12) . . ? 
C12 C3 Ru 126.63(14) . . ? 
C3 C4 C5 107.81(17) . . ? 
C3 C4 C19 126.43(19) . . ? 
C5 C4 C19 125.42(18) . . ? 
C3 C4 Ru 71.27(11) . . ? 
C5 C4 Ru 71.10(11) . . ? 
C19 C4 Ru 128.32(14) . . ? 
C1 C5 C4 106.54(18) . . ? 
C1 C5 C26 125.82(19) . . ? 
C4 C5 C26 126.74(18) . . ? 
C1 C5 Ru 74.48(11) . . ? 
C4 C5 Ru 71.08(11) . . ? 
C26 C5 Ru 128.01(14) . . ? 
C11 C6 C7 117.7(2) . . ? 
C11 C6 C2 123.1(2) . . ? 
C7 C6 C2 119.15(19) . . ? 
C8 C7 C6 121.5(2) . . ? 
C9 C8 C7 119.7(2) . . ? 
C10 C9 C8 119.4(2) . . ? 
C9 C10 C11 121.1(2) . . ? 
C6 C11 C10 120.6(2) . . ? 
C17 C12 C13 118.3(2) . . ? 
C17 C12 C3 119.0(2) . . ? 
C13 C12 C3 122.6(2) . . ? 
C14 C13 C12 120.4(2) . . ? 
C15 C14 C13 121.9(2) . . ? 
C16 C15 C14 117.3(2) . . ? 
C16 C15 C18 121.7(3) . . ? 
C14 C15 C18 121.0(3) . . ? 
C15 C16 C17 122.0(2) . . ? 
C12 C17 C16 120.1(2) . . ? 
C20 C19 C24 117.95(19) . . ? 
C20 C19 C4 122.72(19) . . ? 
C24 C19 C4 119.28(19) . . ? 
C21 C20 C19 120.7(2) . . ? 
C22 C21 C20 121.9(2) . . ? 
C21 C22 C23 117.4(2) . . ? 
C21 C22 C25 121.1(2) . . ? 
C23 C22 C25 121.5(2) . . ? 
C22 C23 C24 121.4(2) . . ? 
C23 C24 C19 120.7(2) . . ? 
C31 C26 C27 118.6(2) . . ? 
C31 C26 C5 120.5(2) . . ? 
C27 C26 C5 120.92(19) . . ? 
C28 C27 C26 120.3(2) . . ? 
C27 C28 C29 120.4(3) . . ? 
C30 C29 C28 119.8(2) . . ? 
C31 C30 C29 119.8(2) . . ? 
C30 C31 C26 121.1(2) . . ? 
O2 C32 Ru 179.1(2) . . ? 
O3 C33 Ru 178.3(2) . . ? 
C35 C34 Ru 133.41(18) . . ? 
C34 C35 C36 119.9(2) . . ? 
O4 C36 C35 126.5(2) . . ? 
  
loop_ 
 _geom_hbond_atom_site_label_D 
 _geom_hbond_atom_site_label_H 
 _geom_hbond_atom_site_label_A 
 _geom_hbond_distance_DH 
 _geom_hbond_distance_HA 
 _geom_hbond_distance_DA 
 _geom_hbond_angle_DHA 
 _geom_hbond_site_symmetry_A 
O1 H1 O4  0.84 1.80 2.572(2) 152.7 2_455 
  
_diffrn_measured_fraction_theta_max    0.970 
_diffrn_reflns_theta_full              26.39 
_diffrn_measured_fraction_theta_full   0.970 
_refine_diff_density_max    0.731 
_refine_diff_density_min   -0.337 
_refine_diff_density_rms    0.056 
